# Supplementary material for: Formation of secondary organic aerosol coating on black carbon particles near vehicular emissions
Source: Copernicus journal article supplement (doi:10.5194/acp-17-15055-2017), 2017-12-20
Supplement: Supplementary file 1 [file acp-17-15055-2017-supplement.pdf]

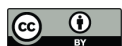

*Supplement of*

## **Formation of secondary organic aerosol coating on black carbon particles near vehicular emissions**

**Alex K. Y. Lee et al.**

*Correspondence to:* Alex K. Y. Lee (ceelkya@nus.edu.sg)

The copyright of individual parts of the supplement might differ from the CC BY 4.0 License.

## PMF analysis

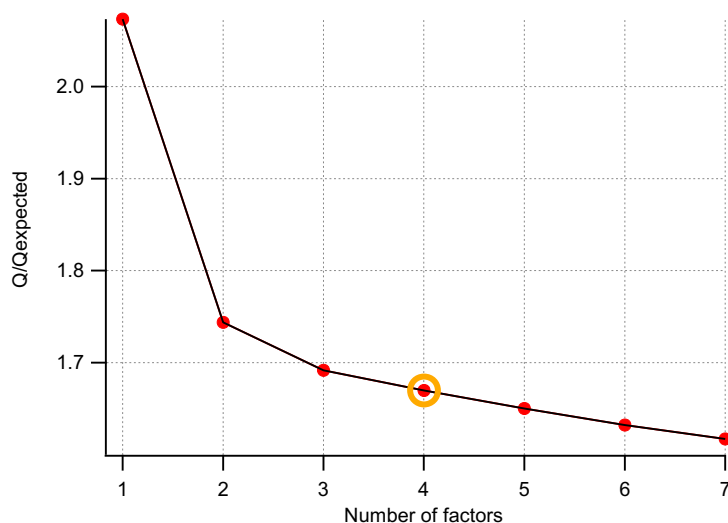

- 5 Figure S1:  $Q/Q_{\text{expected}}$  values as a function of number of PMF factors. A 4-factor solution, including two POA factors from traffic emissions and two SOA factors due to local photochemistry, was determined as a final solution.

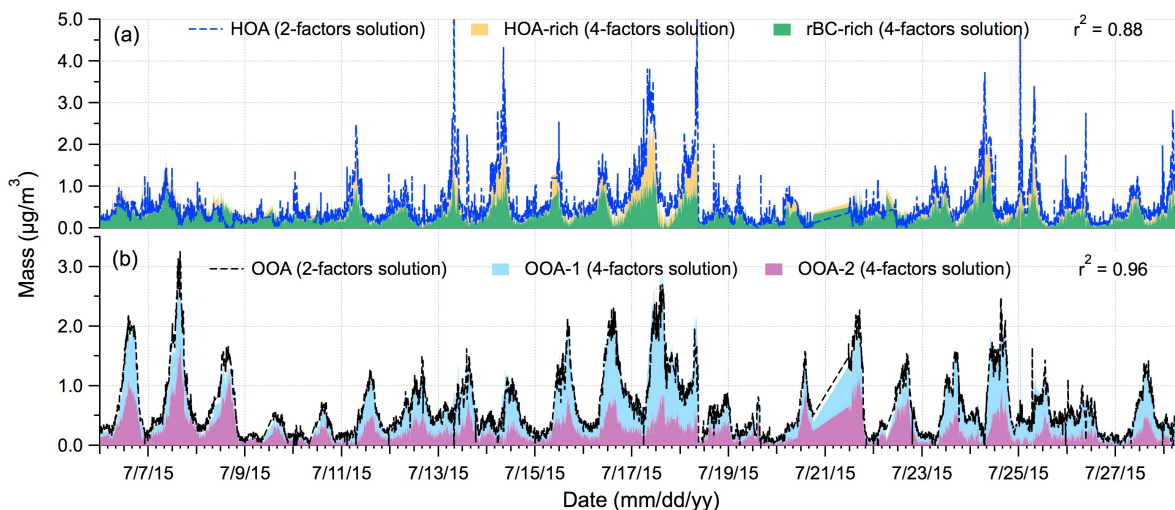

Figure S2: Time series of 2-factor solution: (a) HOA and (b) OOA. Increasing the number of PMF factors to four splits HOA into HOA-rich and rBC-rich factors and OOA into OOA-1 and OOA-2 factors. The physical meanings of individual factors are described in the main text (RIE of 0.26 and 1.4 were applied for rBC and organic fragments, respectively).

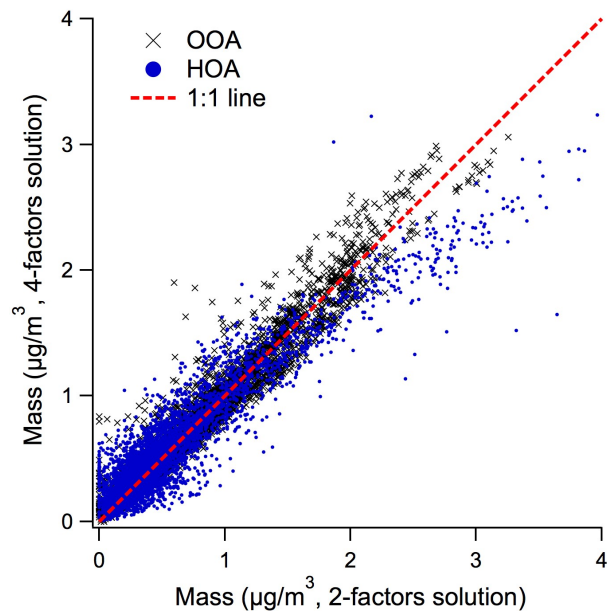

Figure S3: Correlations between 4-factor and 2-factor solutions: (HOA-rich + rBC-rich) vs. HOA and (OOA-1 + OOA-2) vs. OOA. (RIE of 0.26 and 1.4 were applied for rBC and organic fragments, respectively)

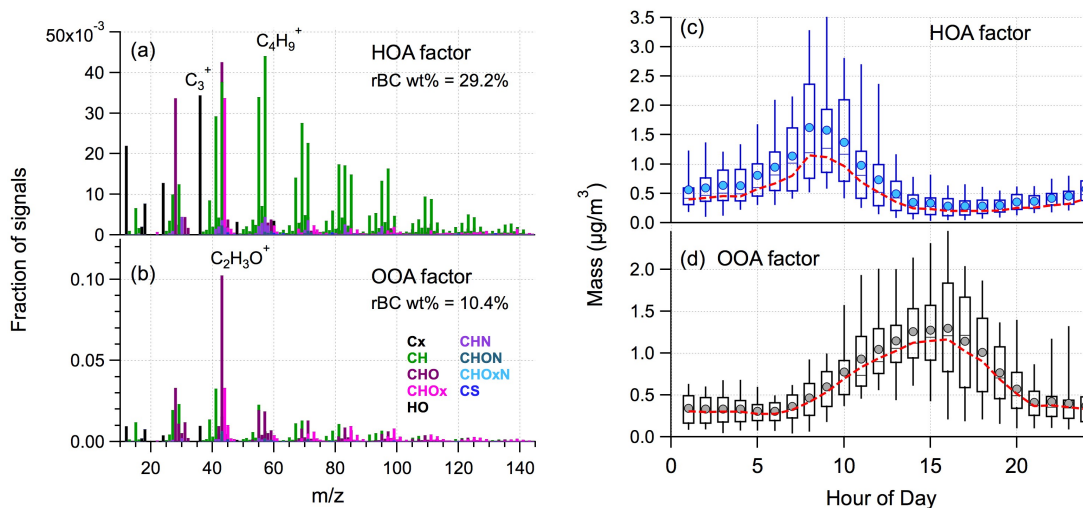

Figure S4: Mass spectra (a-b) and diurnal cycles (c-d) of 2-factor solution from SP-AMS data within the hot period. (Box plots: 5<sup>th</sup>, 25<sup>th</sup>, 50<sup>th</sup>, 75<sup>th</sup> and 95<sup>th</sup> percentile, Filled circles: mean values for organic + C<sub>x</sub><sup>+</sup> fragments, Red dashed lines: mean values for organic alone.

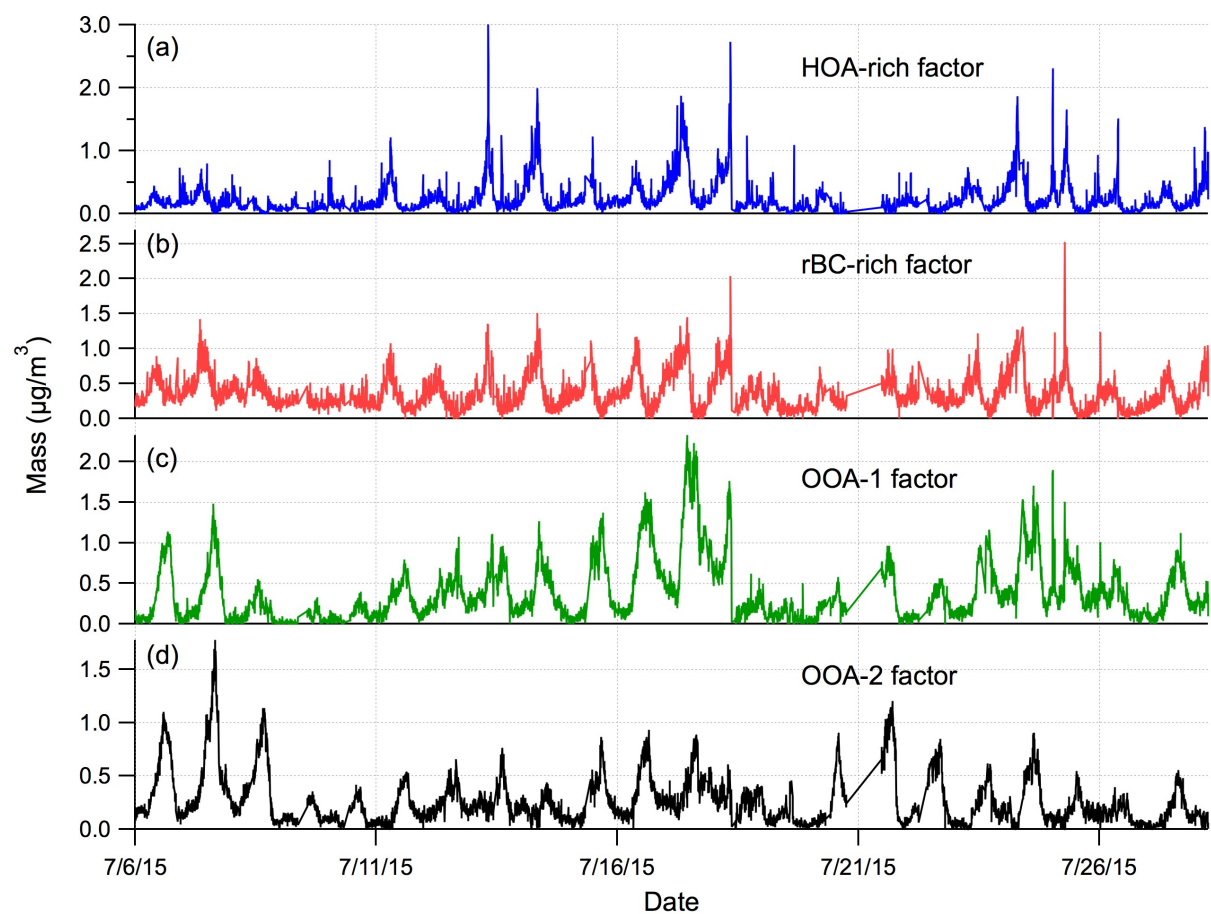

Figure S5: Time series of the 4-factor solution: (a) HOA-rich, (b) rBC-rich, (c) OOA-1, and (d) OOA-2 (RIE of 0.26 and 1.4 were applied for rBC and organic fragments, respectively).

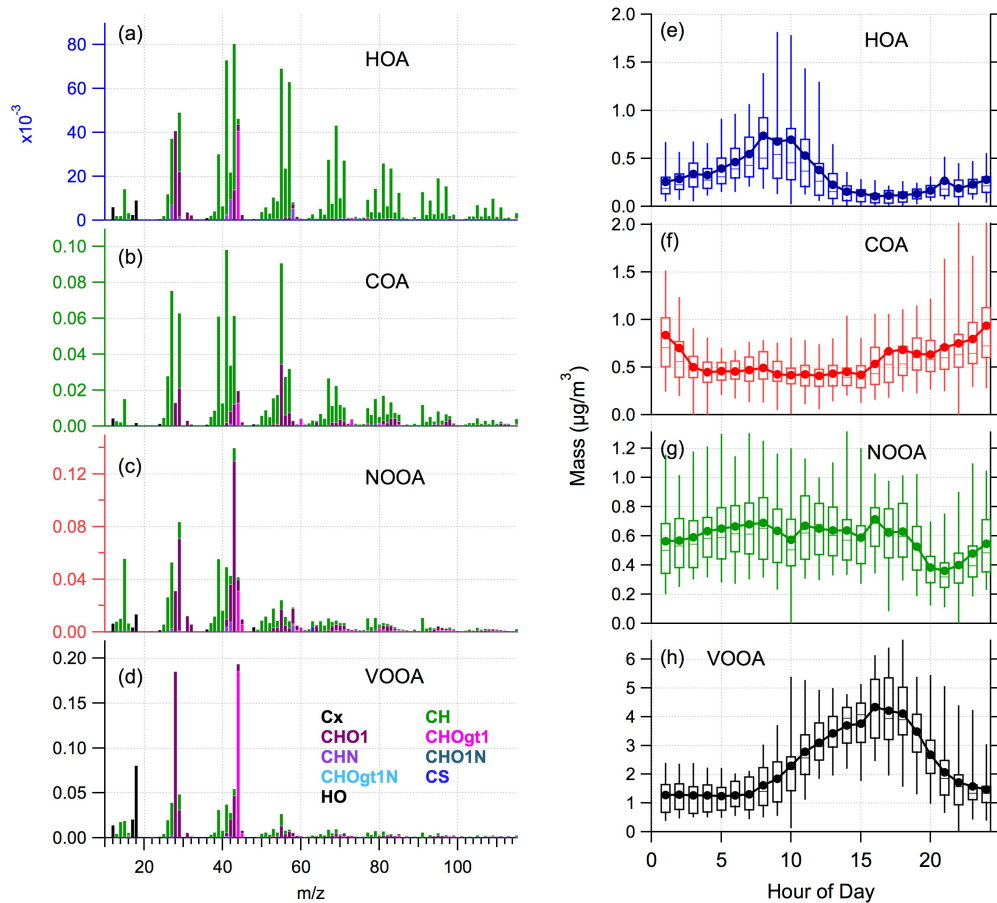

Figure S6: Mass spectra (a-d) and diurnal cycles (e-h) of 4-factor solution from HR-ToF-AMS data within the hot period. (Box plots: 5<sup>th</sup>, 25<sup>th</sup>, 50<sup>th</sup>, 75<sup>th</sup> and 95<sup>th</sup> percentile, Filled circles: mean values) (Chen et al., submitted)

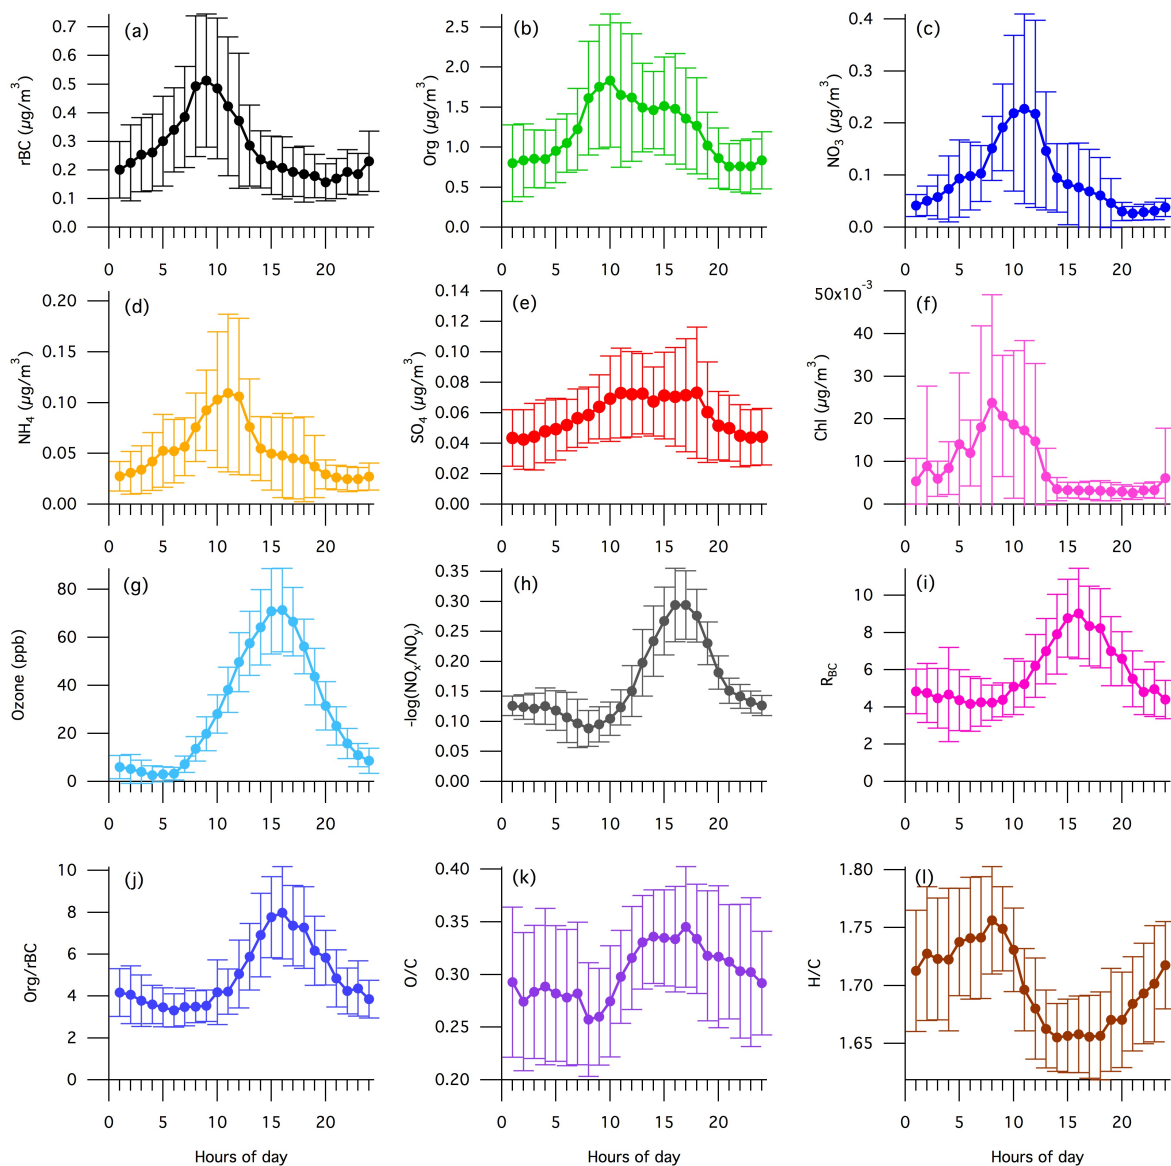

Figure S7: Diurnal cycles of (a) rBC, NR-PM<sub>rBC</sub> components, including (b) Organics, (c) nitrate, (d) ammonium, (e) sulfate and (f) chloride, (g) ozone, (h)  $-\log(\text{NO}_x/\text{NO}_y)$ , (i)  $R_{\text{BC}}$ , (j) Org/rBC ratio, (k) O/C and (l) H/C of organic coating. The data points represent average values and the error bars represent one standard deviation.

## References:

- Chen, C.-L., Chen, S., Russell, L. M., Liu, J., Price, D. J., Betha, R., Sanchez, K. J., Lee A. K. Y., Collier, S. C., Zhang, Q., Kumar, A., Kleeman, M., Zhang, X., and Cappa, C. D.: Organic aerosol  
5 particle chemical properties associated with residential burning and fog in wintertime San Joaquin Valley (Fresno) and with vehicle and firework emissions in summertime South Coast Air Basin (Fontana), submitted.
